# Supplementary material for: Site engineering strategy toward enhanced luminescence thermostability of a Cr3+-doped broadband NIR phosphor and its application
Source: Royal Society of Chemistry journal article supplement (doi:10.1039/d1qm00074h), 2021-01-01
Supplement: d1qm00074h1.pdf [file d1qm00074h1.pdf]

# Site engineering strategy toward enhanced luminescence thermostability of Cr<sup>3+</sup> doped broadband NIR phosphor and its application

Shengqiang Liu, Hao Cai, Shiyu Zhang, Zhen Song, Zhiguo Xia, Quanlin Liu\*

The Beijing Municipal Key Laboratory of New Energy Materials and Technologies, School of Materials Sciences and Engineering, University of Science and Technology Beijing, Beijing 100083, China.

\* Corresponding Author: E-mail address: ql Liu@ustb.edu.cn (Quanlin Liu)

Table S 1. The refined structural parameters of SGO with P  $6_3/mmc$ .

| Atom                   | x         | y         | z        | Occ.  | Site |                        |                             |
|------------------------|-----------|-----------|----------|-------|------|------------------------|-----------------------------|
| 1 Ga Ga <sup>I</sup>   | 0.000(0)  | 0.000(0)  | 0.000(0) | 1.000 | 2a   | space group            | <i>P</i> $6_3/mmc$<br>(194) |
| 3 Ga Ga <sup>II</sup>  | 0.000(0)  | 0.000(0)  | 0.242(7) | 0.500 | 4e   |                        |                             |
| 4 Ga Ga <sup>III</sup> | 0.333(3)  | 0.666(7)  | 0.027(4) | 1.000 | 4f   | symmetry               | hexagonal                   |
| 6 Ga Ga <sup>IV</sup>  | 0.333(3)  | 0.666(7)  | 0.190(1) | 1.000 | 4f   | Lattice                | a=5.793(0)                  |
| 7 Ga Ga <sup>V</sup>   | -0.168(5) | 0.163(1)  | 0.109(5) | 1.000 | 12k  | parameters (Å)         | c=22.819(1)                 |
| 8 O O <sup>I</sup>     | 0.000(0)  | 0.000(0)  | 0.150(7) | 1.000 | 4e   |                        |                             |
| 9 O O <sup>II</sup>    | 0.666(7)  | 0.333(3)  | 0.055(3) | 1.000 | 4f   | <i>R<sub>p</sub></i>   | 7.101                       |
| 10 O O <sup>III</sup>  | 0.181(8)  | -0.181(8) | 0.250(0) | 1.000 | 6h   | <i>R<sub>w</sub></i>   | 9.413                       |
| 11 O O <sup>IV</sup>   | 0.155(5)  | -0.155(5) | 0.052(5) | 1.000 | 12k  | <i>R<sub>exp</sub></i> | 4.219                       |
| 12 O O <sup>V</sup>    | 0.504(5)  | -0.504(5) | 0.150(0) | 1.000 | 12k  |                        |                             |
| 13 Sr Sr <sup>I</sup>  | 0.666(7)  | 0.333(3)  | 0.250(0) | 1.000 | 2d   |                        |                             |

Table S 2. Ga-O bond length data derived from refined results.

|                    | Bond length (Å) | Average (Å) |                     | Bond length (Å) | Average (Å) |                    | Bond length (Å) | Average (Å) |
|--------------------|-----------------|-------------|---------------------|-----------------|-------------|--------------------|-----------------|-------------|
| Ga <sup>I</sup> -O | 1.967(1)        | 1.967       | Ga <sup>IV</sup> -O | 1.944(7)        | 1.996       | Ga <sup>V</sup> -O | 2.073(5)        | 1.979       |
|                    | 1.967(1)        |             |                     | 2.046(3)        |             |                    | 1.923(4)        |             |
|                    | 1.967(1)        |             |                     | 1.944(7)        |             |                    | 1.874(7)        |             |
|                    | 1.967(1)        |             |                     | 2.046(3)        |             |                    | 2.073(5)        |             |
|                    | 1.967(1)        |             |                     | 2.046(3)        |             |                    | 1.874(4)        |             |
|                    | 1.967(1)        |             |                     | 1.944(7)        |             |                    | 2.056(2)        |             |

Table S 3. Photoluminescence properties of some Cr<sup>3+</sup> doped shost.

| Host                                                                | E <sub>m</sub> (nm) | IQE (%) | EQE (%) | I <sub>500K</sub> (%) | Refs      |
|---------------------------------------------------------------------|---------------------|---------|---------|-----------------------|-----------|
| LiScP <sub>2</sub> O <sub>7</sub>                                   | 877                 | 38      | 20      | < 20                  | S1        |
| LaSc <sub>3</sub> (BO <sub>3</sub> ) <sub>4</sub>                   | 850                 | 23      | ~       | < 30                  | S2        |
| ScBO <sub>3</sub>                                                   | 800                 | 72.8    | ~       | ~                     | S3        |
| La <sub>2</sub> MgZrO <sub>6</sub>                                  | 825                 | 58      | ~       | < 40                  | S4        |
| Ca <sub>2</sub> LuZr <sub>2</sub> Al <sub>3</sub> O <sub>12</sub>   | 760                 | 69.1    | 31.5    | 40                    | S5        |
| Ca <sub>2</sub> LuScGa <sub>2</sub> Ge <sub>2</sub> O <sub>12</sub> | 800                 | 53      | ~       | < 40                  | S6        |
| Ca <sub>3</sub> Sc <sub>2</sub> Si <sub>3</sub> O <sub>12</sub>     | ~770                | 92.3    | 25.5    | 90                    | S7        |
| Y <sub>2</sub> CaAl <sub>4</sub> SiO <sub>12</sub>                  | 744                 | 75.9    | ~       | < 80                  | S8        |
| SrGa <sub>12</sub> O <sub>19</sub>                                  | 770                 | 98.2    | 45      | 86.5                  | This work |

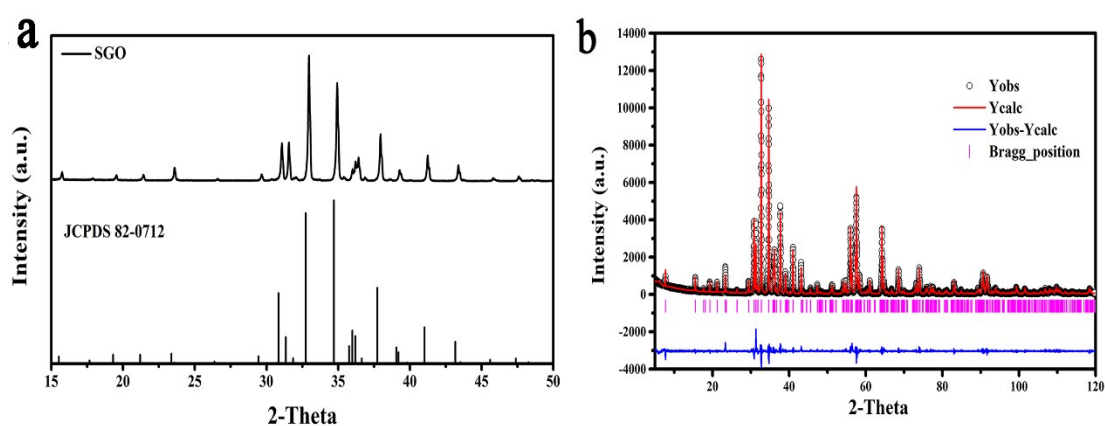

Figure S1. (a) XRD patterns of un-doped SGO and standard Bragg reflection peaks of JCPDS 82-0712. (b) Rietveld refinement result of un-doped SGO.

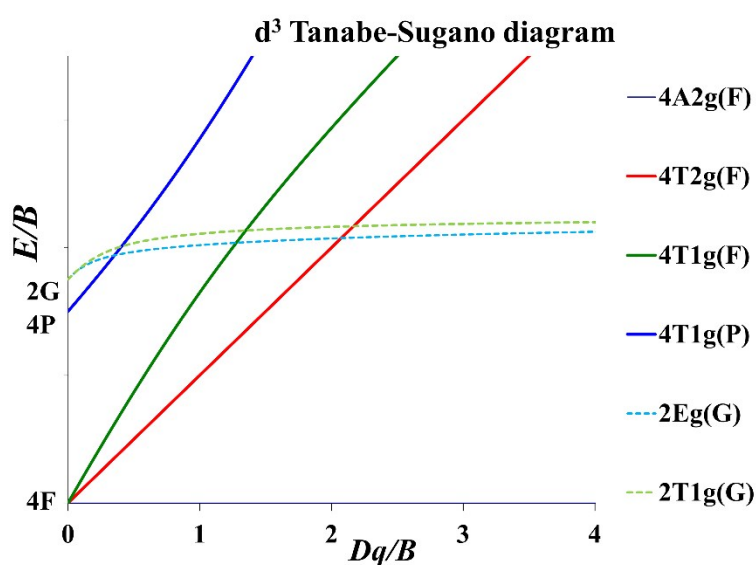

Figure S2. Tanabe—Sugano energy-level diagram for Cr<sup>3+</sup> ([Ar]3d<sup>3</sup>) in SGO host.

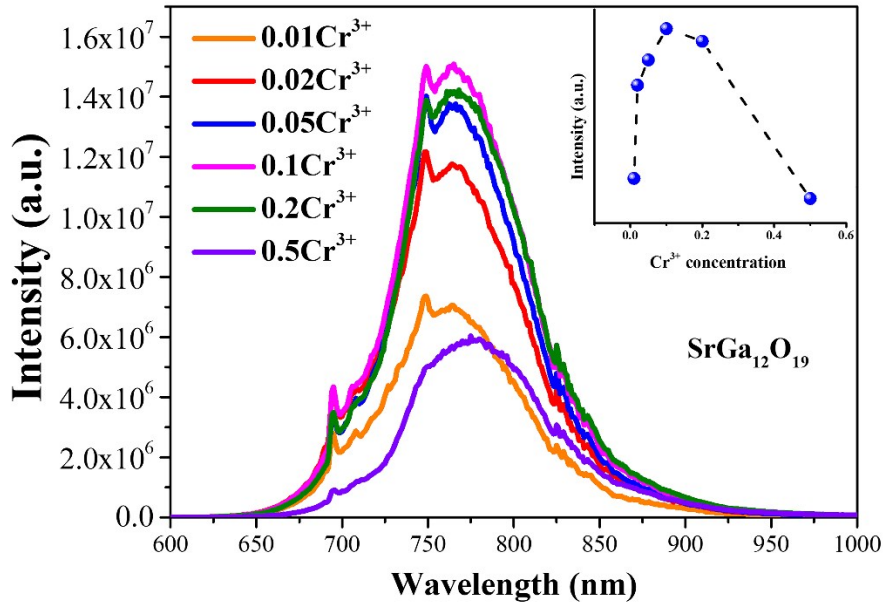

Figure S3. Concentration-dependence PL spectra for  $\text{SrGa}_{12-x}\text{O}_{19}:x\text{Cr}^{3+}$  ( $x=0.01, 0.02, 0.05, 0.1, 0.2, 0.5$ ). The inset shows the integrated intensity vs  $\text{Cr}^{3+}$  concentration scatters.

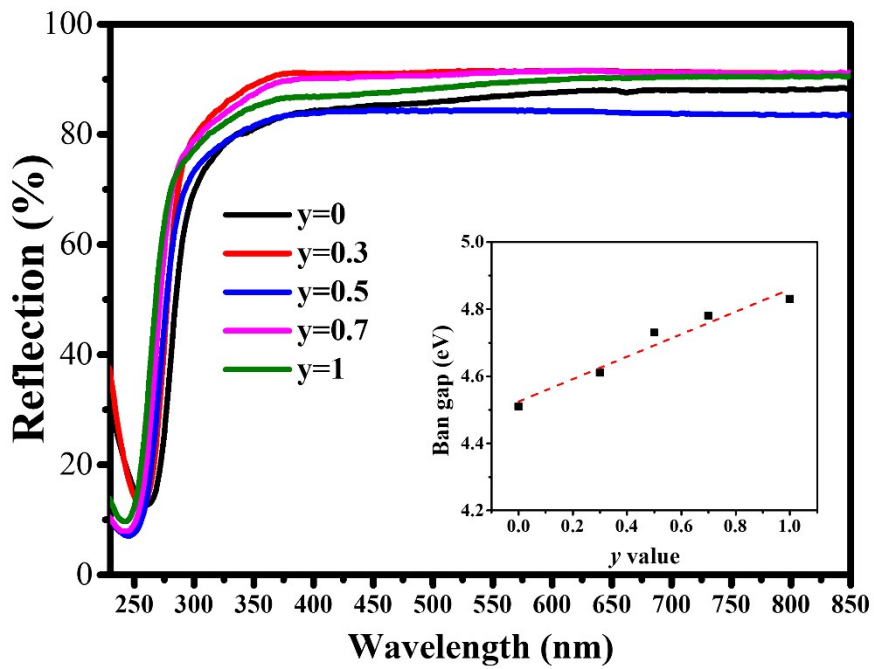

Figure S4. UV diffuse reflection spectra for the solid solution  $(\text{SrGa})_{1-y}(\text{LaMg})_y\text{Ga}_{11}\text{O}_{19}$ . ( $y=0-1$ ). The inset shows the bandgap (eV) as a function of  $y$  value.

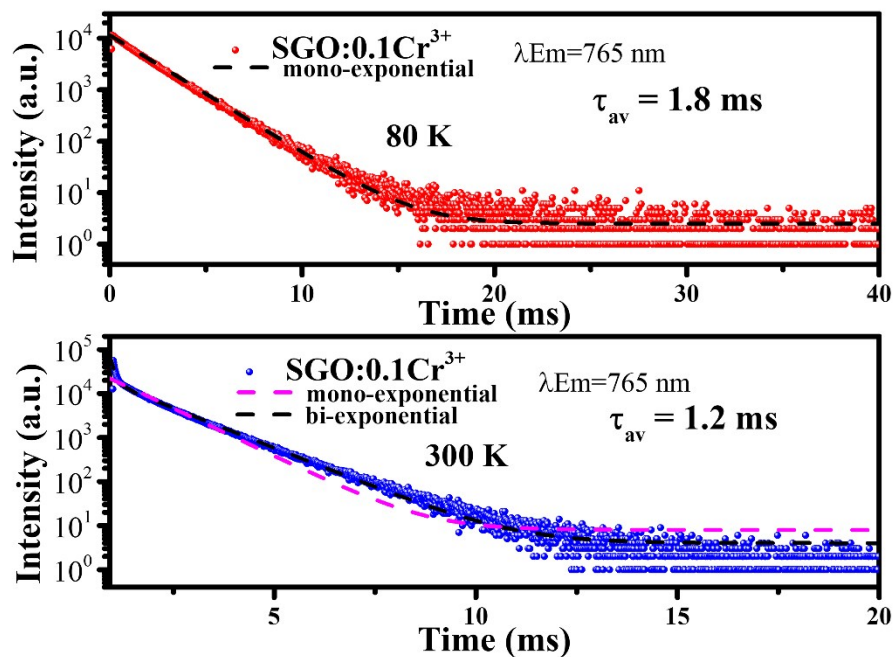

Figure S5. luminescence decay curves and multi-exponential fitting of  $\text{SrGa}_{12}\text{O}_{19}:0.1\text{Cr}^{3+}$  at 80 and 300 K.

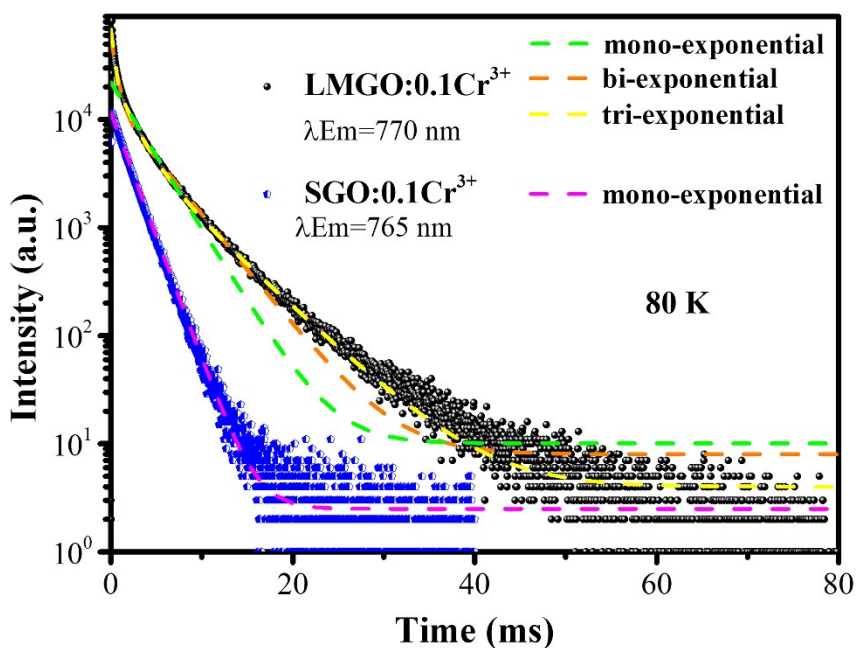

Figure S6. luminescence decay curves for  $\text{LaMgGa}_{10.9}\text{O}_{19}:0.1\text{Cr}^{3+}$  and  $\text{SrGa}_{11.9}\text{O}_{19}:0.1\text{Cr}^{3+}$ , and multi-exponential fitting results at 80 K.

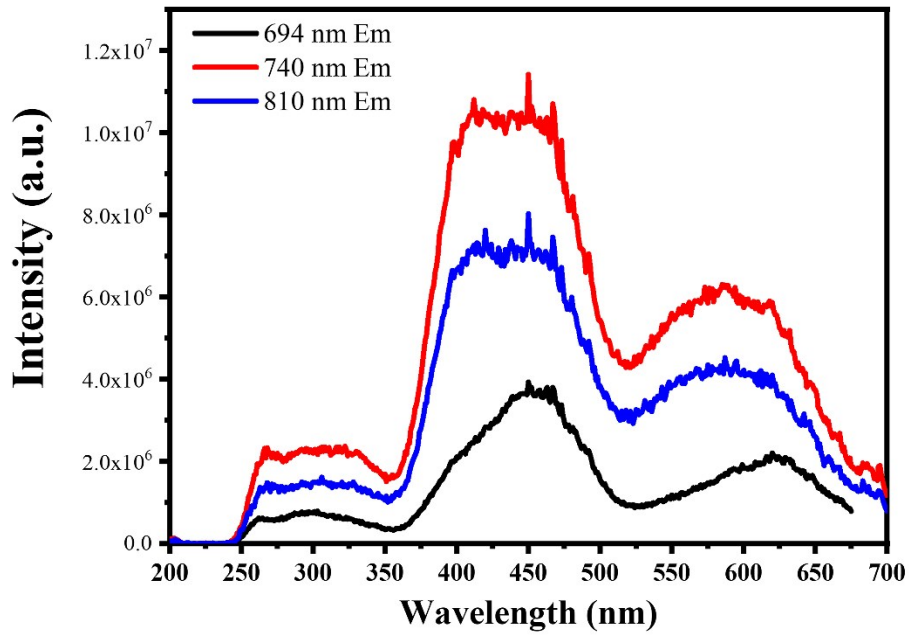

Figure S7. PLE spectra of SGO:0.1Cr<sup>3+</sup> monitoring at different emission wavelength (694, 740, 810 nm).

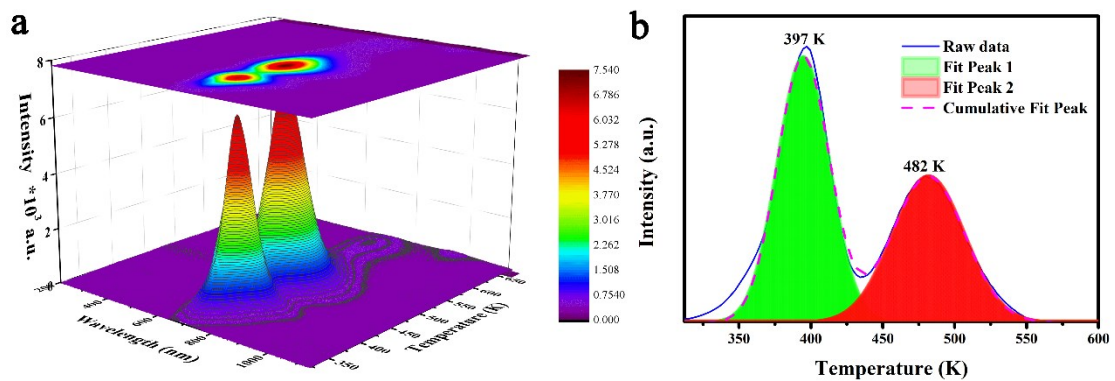

Figure S8. (a) 3D-TL curves for SGO:0.1Cr<sup>3+</sup>. The x and y axes denote the temperature (K) and emission wavelength (nm), respectively. (b) 2D-TL curve for SGO:0.1Cr<sup>3+</sup> and Gaussian fitting curves.

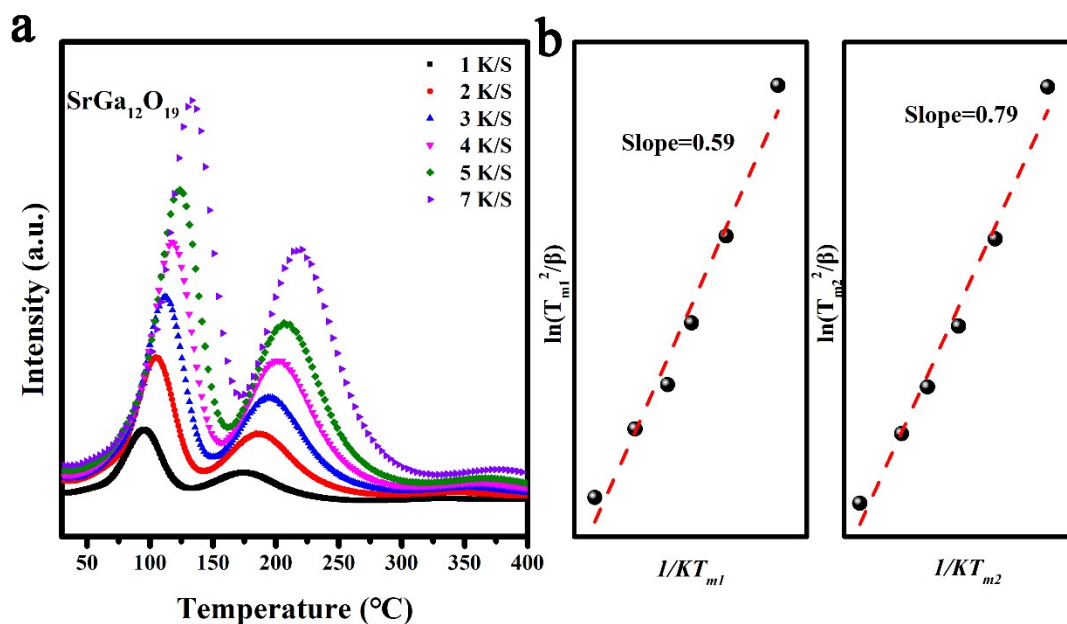

Figure S9. (a) 2D-thermoluminescence curves of SrGa<sub>12</sub>O<sub>19</sub>:0.1Cr<sup>3+</sup> via tunable heating rate  $\beta$  ( $\beta=1, 2, 3, 4, 5, 7$  K/s) approach. (b)  $\ln(T_m^2/\beta)$  versus  $1/kT_m$  scatter and linear fitting results.

#### References:

- [1] L. Yao, Q. Shao, S. Han, C. Liang, J. He, J. Jiang, Enhancing Near-Infrared Photoluminescence Intensity and Spectral Properties in Yb<sup>3+</sup> Codoped LiScP<sub>2</sub>O<sub>7</sub>:Cr<sup>3+</sup>, *Chem. Mater.* 2020, 32, 2430–2439.
- [2] T. Gao, W. Zhuang, R. Liu, Y. Liu, C. Yan, X. Chen, Design of a Broadband NIR Phosphor for Security-Monitoring LEDs: Tunable Photoluminescence Properties and Enhanced Thermal Stability, *Cryst. Growth Des.* 2020, 20, 3851–3860.
- [3] M.-H. Fang, P.-Y. Huang, Z. Bao, N. Majewska, T. Leśniewski, S. Mahlik, M. Grinberg, G. Leniec, S.M. Kaczmarek, C.-W. Yang, K.-M. Lu, H.-S. Sheu, R.-S. Liu, Penetrating Biological Tissue Using Light-Emitting Diodes with a Highly Efficient Near-Infrared ScBO<sub>3</sub>:Cr<sup>3+</sup> Phosphor, *Chem. Mater.* 2020, 32, 2166–2171.
- [4] H. Zeng, T. Zhou, L. Wang, R.-J. Xie, Two-Site Occupation for Exploring Ultra-Broadband Near-Infrared Phosphor—Double-Perovskite La<sub>2</sub>MgZrO<sub>6</sub>:Cr<sup>3+</sup>, *Chem. Mater.* 2019, 31, 5245–5253.
- [5] L. Zhang, S. Zhang, Z. Hao, X. Zhang, G.H. Pan, Y. Luo, H. Wu, J. Zhang, A high efficiency broad-band near-infrared Ca<sub>2</sub>LuZr<sub>2</sub>Al<sub>3</sub>O<sub>12</sub>:Cr<sup>3+</sup> garnet phosphor for blue LED chips, *J. Mater. Chem. C.* 2018, 6, 4967.
- [6] B. Bai, P. Dang, D. Huang, H. Lian, J. Lin, Broadband Near-Infrared Emitting Ca<sub>2</sub>LuScGa<sub>2</sub>Ge<sub>2</sub>O<sub>12</sub>:Cr<sup>3+</sup> Phosphors: Luminescence Properties and Application in Light-Emitting Diodes, *Inorg. Chem.* 2020, 59, 13481–13488.
- [7] Z. Jia, C. Yuan, Y. Liu, X.-J. Wang, P. Sun, L. Wang, H. Jiang, J. Jiang, Strategies to approach high performance in Cr<sup>3+</sup>-doped phosphors for high-power NIR-LED light sources, *Light Sci. Appl.* 2020, 9, 86.
- [8] M. Mao, T. Zhou, H. Zeng, L. Wang, F. Huang, X. Tang, R.J. Xie, Broadband near-infrared (NIR) emission realized by the crystal-field engineering of Y<sub>3-x</sub>Ca<sub>x</sub>Al<sub>5-x</sub>Si<sub>x</sub>O<sub>12</sub>:Cr<sup>3+</sup> ( $x = 0-2.0$ ) garnet phosphors, *J. Mater. Chem. C.* 2020, 8, 1981.
